# Supplementary material for: Antibody neutralization of SARS-CoV-2 through ACE2 receptor mimicry
Source: PubMed Central journal article supplement (PMC7801515; doi:10.1038/s41467-020-20501-9), 2021-01-11
Supplement: 41467_2020_20501_MOESM1_ESM.pdf [file 41467_2020_20501_MOESM1_ESM.pdf]

## **Antibody neutralization of SARS-CoV-2 through ACE2 receptor mimicry**

Jiwan Ge<sup>1,\*</sup>, Ruoke Wang<sup>2,\*</sup>, Bin Ju<sup>3,\*</sup>, Qi Zhang<sup>2,\*</sup>, Jing Sun<sup>4</sup>, Peng Chen<sup>2</sup>, Senyan Zhang<sup>1</sup>, Yuling Tian<sup>1</sup>, Sisi Shan<sup>2</sup>, Ling Cheng<sup>3</sup>, Bing Zhou<sup>3</sup>, Shuo Song<sup>3</sup>, Juanjuan Zhao<sup>3</sup>, Haiyan Wang<sup>3</sup>, Xuanling Shi<sup>2</sup>, Qiang Ding<sup>2</sup>, Lei Liu<sup>3</sup>, Jincun Zhao<sup>4</sup>, Zheng Zhang<sup>3,#</sup>, Xinquan Wang<sup>1,#</sup> and Linqi Zhang<sup>2,#</sup>

<sup>1</sup>The Ministry of Education Key Laboratory of Protein Science, Beijing Advanced Innovation Center for Structural Biology, Beijing Frontier Research Center for Biological Structure, Collaborative Innovation Center for Biotherapy, School of Life Sciences, Tsinghua University, Beijing 100084, China

<sup>2</sup>Comprehensive AIDS Research Center, Beijing Advanced Innovation Center for Structural Biology, School of Medicine and Vanke School of Public Health, Tsinghua University, Beijing 100084, China

<sup>3</sup>Institute for Hepatology, National Clinical Research Center for Infectious Disease, Shenzhen Third People's Hospital; The Second Affiliated Hospital, School of Medicine, Southern University of Science and Technology, Shenzhen 518112, Guangdong Province, China

<sup>4</sup>State Key Laboratory of Respiratory Disease, National Clinical Research Center for Respiratory Disease, Guangzhou Institute of Respiratory Health, the First Affiliated Hospital of Guangzhou Medical University, Guangzhou, Guangdong 510182, China

\*These authors contributed equally to this work.

#Correspondence:

[zhangzheng1975@aliyun.com](mailto:zhangzheng1975@aliyun.com) (Z.Z)

[xinquanwang@mail.tsinghua.edu.cn](mailto:xinquanwang@mail.tsinghua.edu.cn) (X.W.)

[zhanglinqi@tsinghua.edu.cn](mailto:zhanglinqi@tsinghua.edu.cn) (L.Z.)

Supplementary information  
Supplementary Figures 1-8  
Supplementary Tables 1-3

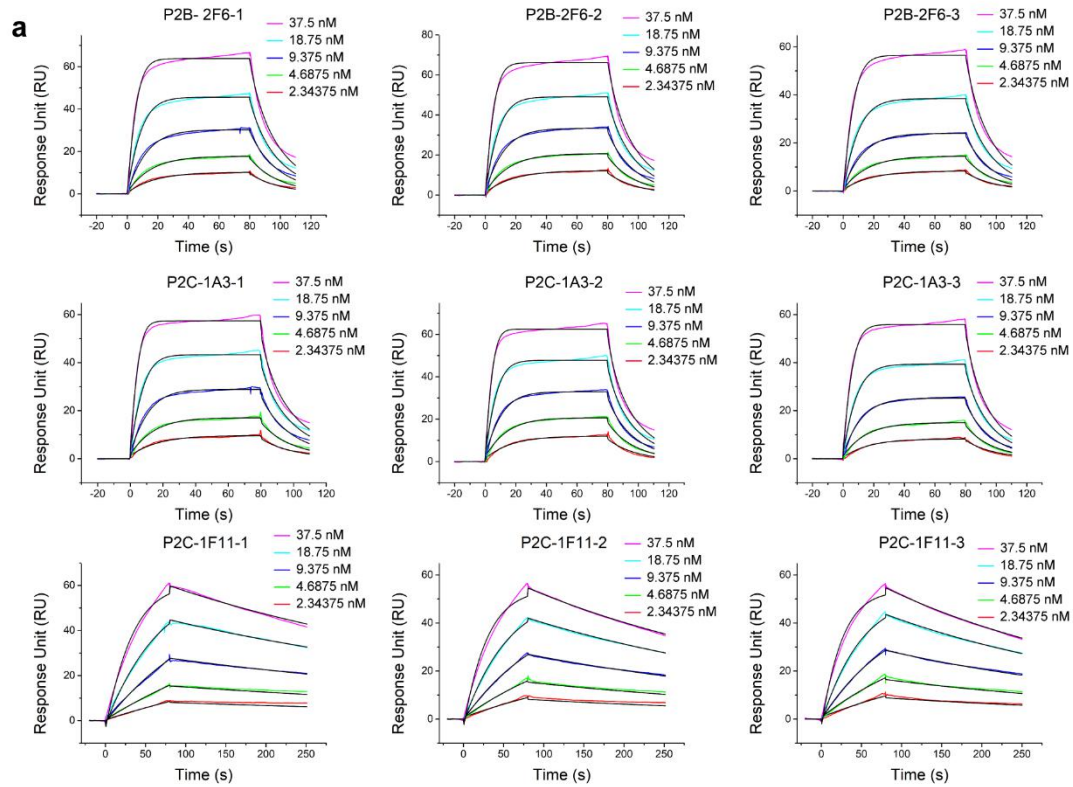

**b**

|            | $k_a$ (1/Ms) | $k_d$ (1/s) | $K_D$ (nM) | $K_D$ (nM)   |
|------------|--------------|-------------|------------|--------------|
| P2B-2F6-1  | 6.478E+6     | 0.09106     | 14.06      | 15.62 ± 2.94 |
| P2B-2F6-2  | 7.407E+6     | 0.1022      | 13.80      |              |
| P2B-2F6-3  | 5.383E+6     | 0.1023      | 19.01      |              |
| P2C-1A3-1  | 1.115E+7     | 0.1029      | 9.23       | 12.24 ± 4.05 |
| P2C-1A3-2  | 1.181E+7     | 0.1258      | 10.65      |              |
| P2C-1A3-3  | 6.985E+6     | 0.1177      | 16.85      |              |
| P2C-1F11-1 | 1.944E+6     | 0.002129    | 1.10       | 1.72 ± 0.84  |
| P2C-1F11-2 | 1.905E+6     | 0.002625    | 1.38       |              |
| P2C-1F11-3 | 1.133E+6     | 0.003031    | 2.67       |              |

**Supplementary Fig. 1 Measurement of  $K_D$  by SPR.** (a) Binding curves of immobilized neutralizing antibody (P2B-2F6, P2C-1A3 and P2C-1F11) to the SARS-CoV-2 RBD. Data are presented by colored lines and the best fit of the data to a 1:1 binding model are shown in black. (b) Summary of the binding kinetics between SARS-CoV-2 RBD and the neutralizing antibodies measured in three independent experiments.

WT T415A K417A D420A Y421A L455A F456A R457A K458A N460A Y473A S477A F486A N487A Y489A Q493A Y505A NC

ACE2

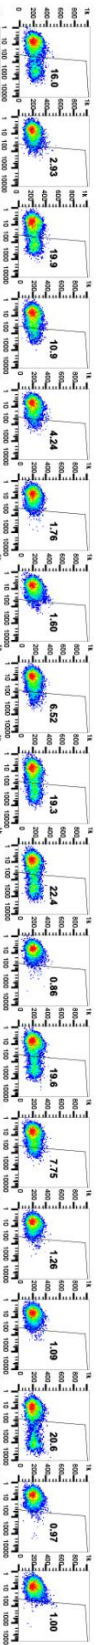

P2C-1F11

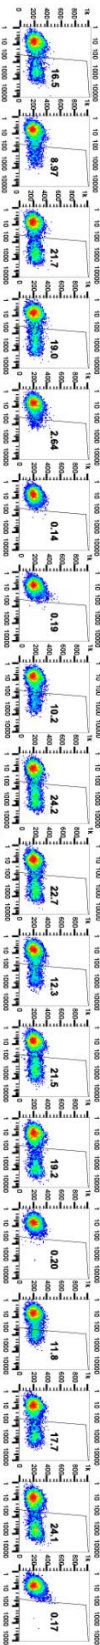

P2C-1A3

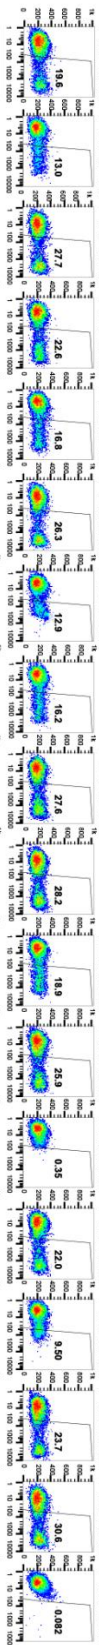

P2B-2F6

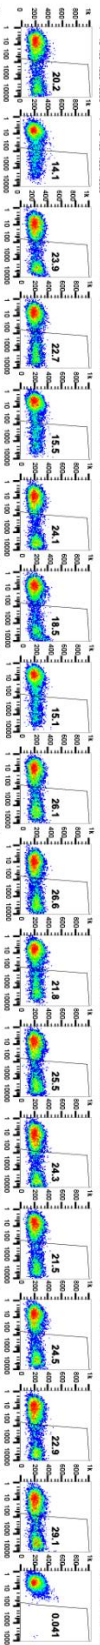

ZK2B10

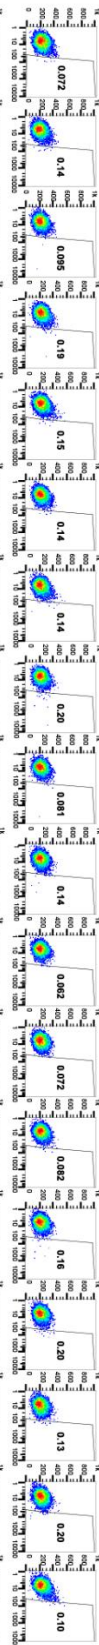

S2 mAb

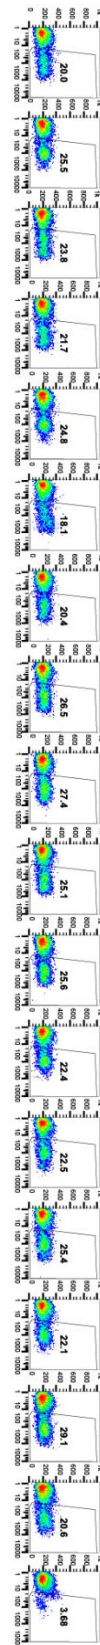

**Supplementary Fig. 2 Binding of recombinant ACE2 and the nAbs to HEK 293T cell surface expressed wild-type or 16 single alanine mutated S of SARS-CoV-2.**

For each panel, X-axis means ACE2 or tested antibody binding-PE/APC and Y-axis means SSC. The percentage of positive cells are highlighted in the gate. S2 is a positive control antibody used for S expression normalization while ZK2B10 is negative control antibody specific for DIII of Zika virus glycoprotein. Mock transfected cells (NC) were used as the background control. The panel shows one representative experiment from data shown in Fig. 3a-d.

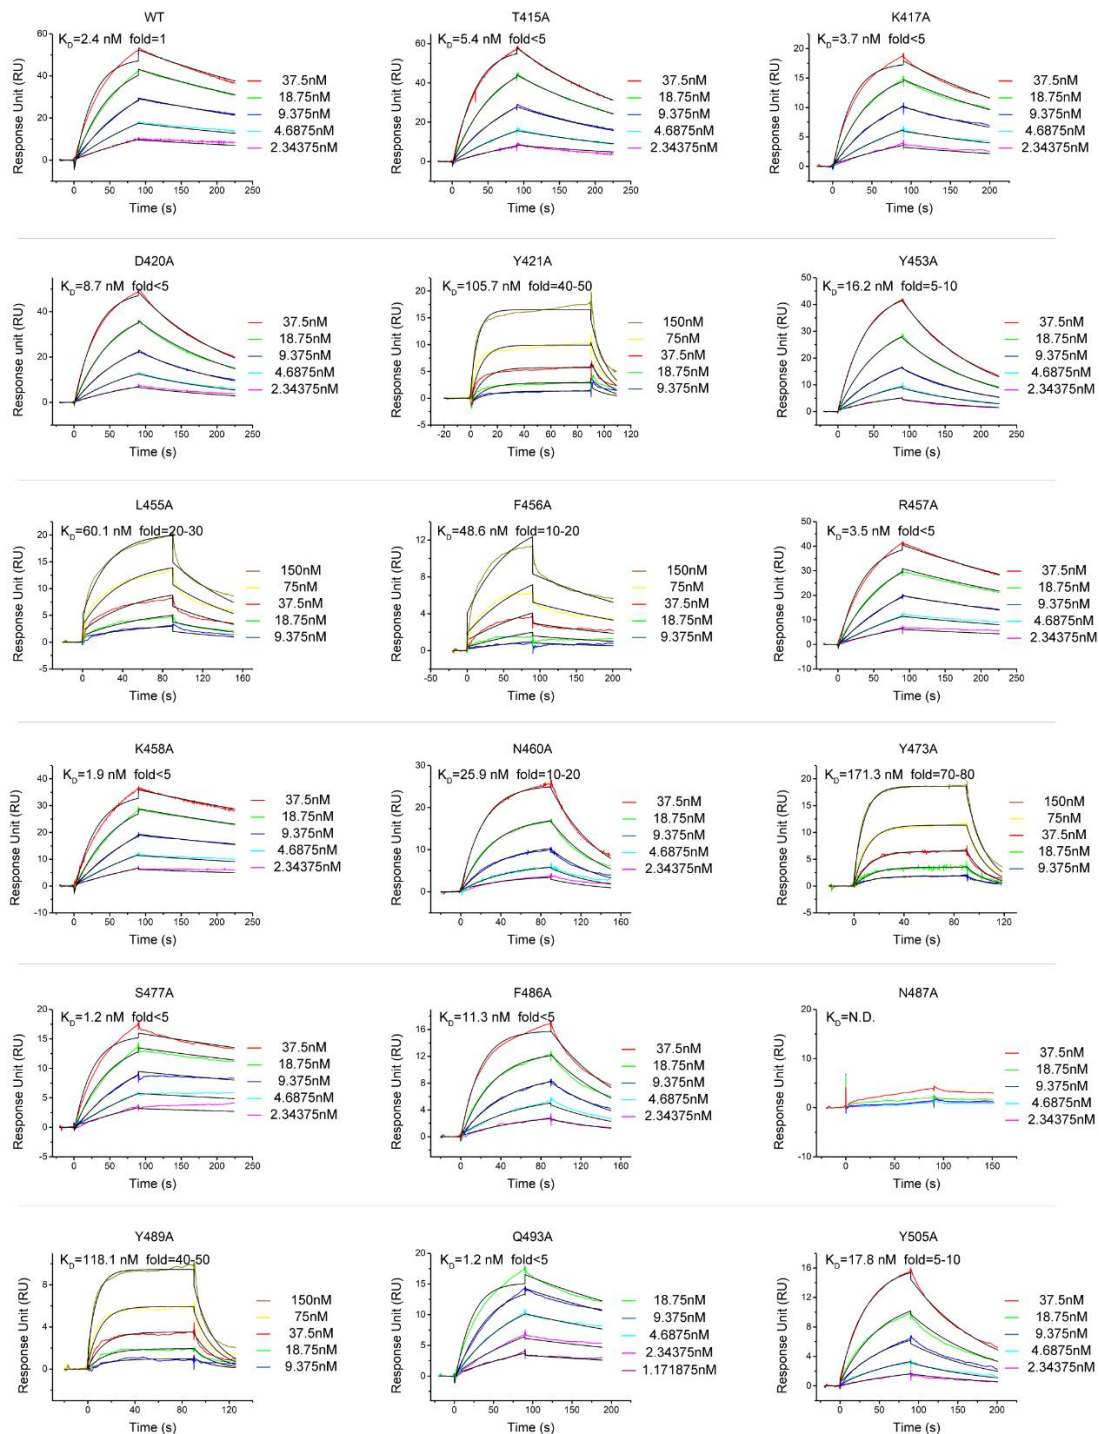

**Supplementary Fig. 3 Binding kinetics of P2C-1F11 to wild-type or mutant SARS-CoV-2 RBD measured by SPR.** P2C-1F11 was immobilized on the CM5 sensor and wild type or mutant SARS-CoV-2 RBD was flowed through the system in serial concentrations. Colored lines indicate the experimentally derived curves. Black lines represent best fitted curves based on the experimental data. The calculated KD and fold changes for P2C-1F11 binding to each mutant RBD relative to those of wild-type are indicated.

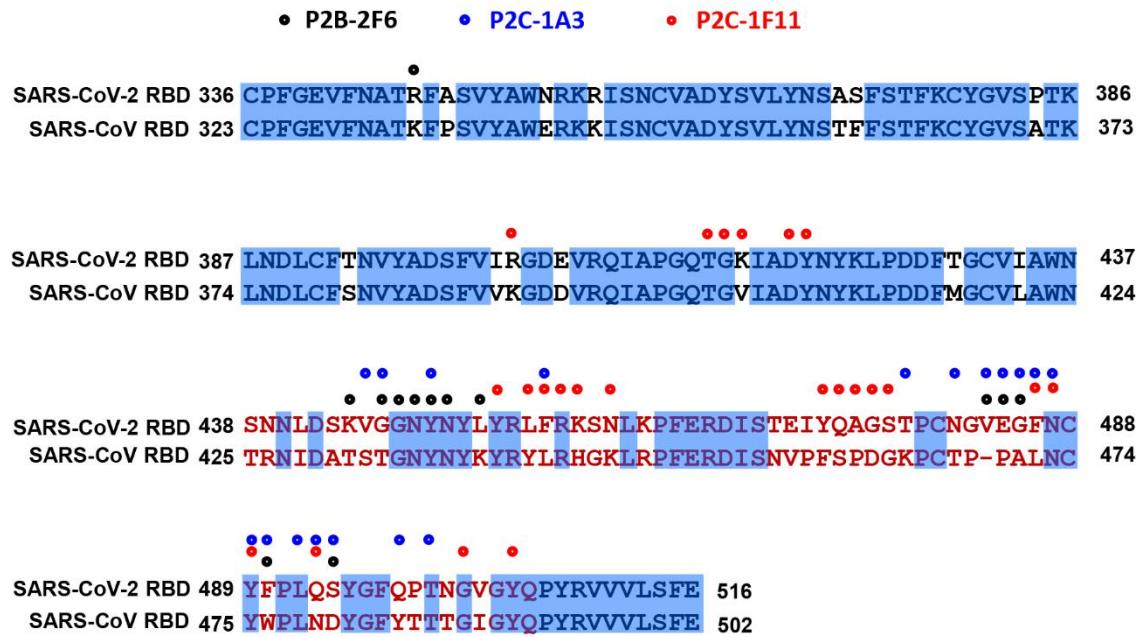

**Supplementary Fig. 4 Comparing epitope residues of P2C-1F11, P2C-1A3 and P2B-2F6 along the SARS-CoV-2 and SARS-CoV RBD alignments.** Epitope residues of P2C-1F11, P2C-1A3 and P2B-2F6 are indicated by red, blue and black circles, respectively. Blue boxes highlight conserved residues between the two RBD sequences. Red residues are those located within the receptor binding motif (RBM).

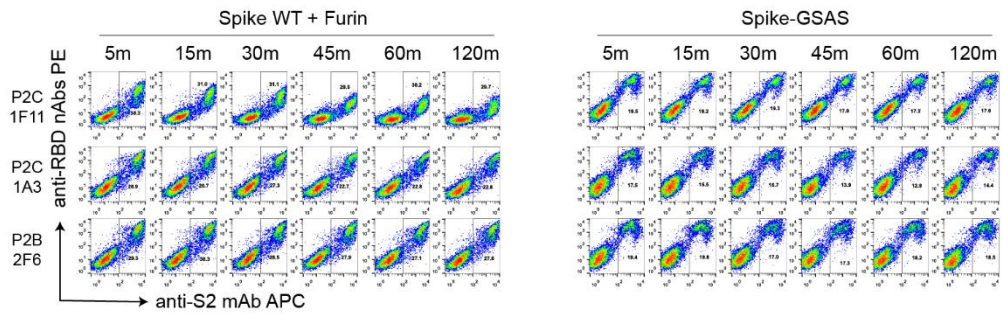

**Supplementary Fig. 5** Dynamics of S1, S2, S1/S2 ratios on the cell surface measured by flow cytometry at 37°C with co-transfection of the plasmid encoding Furin protease, (left) or with a mutated S containing GSAS substitution at S1/S2 cleavage motif (right). An anti-S2 antibody were added at the end of incubation with the testing antibodies and detected simultaneously. The panel shows one representative experiment from data shown in Fig. 4a-f.

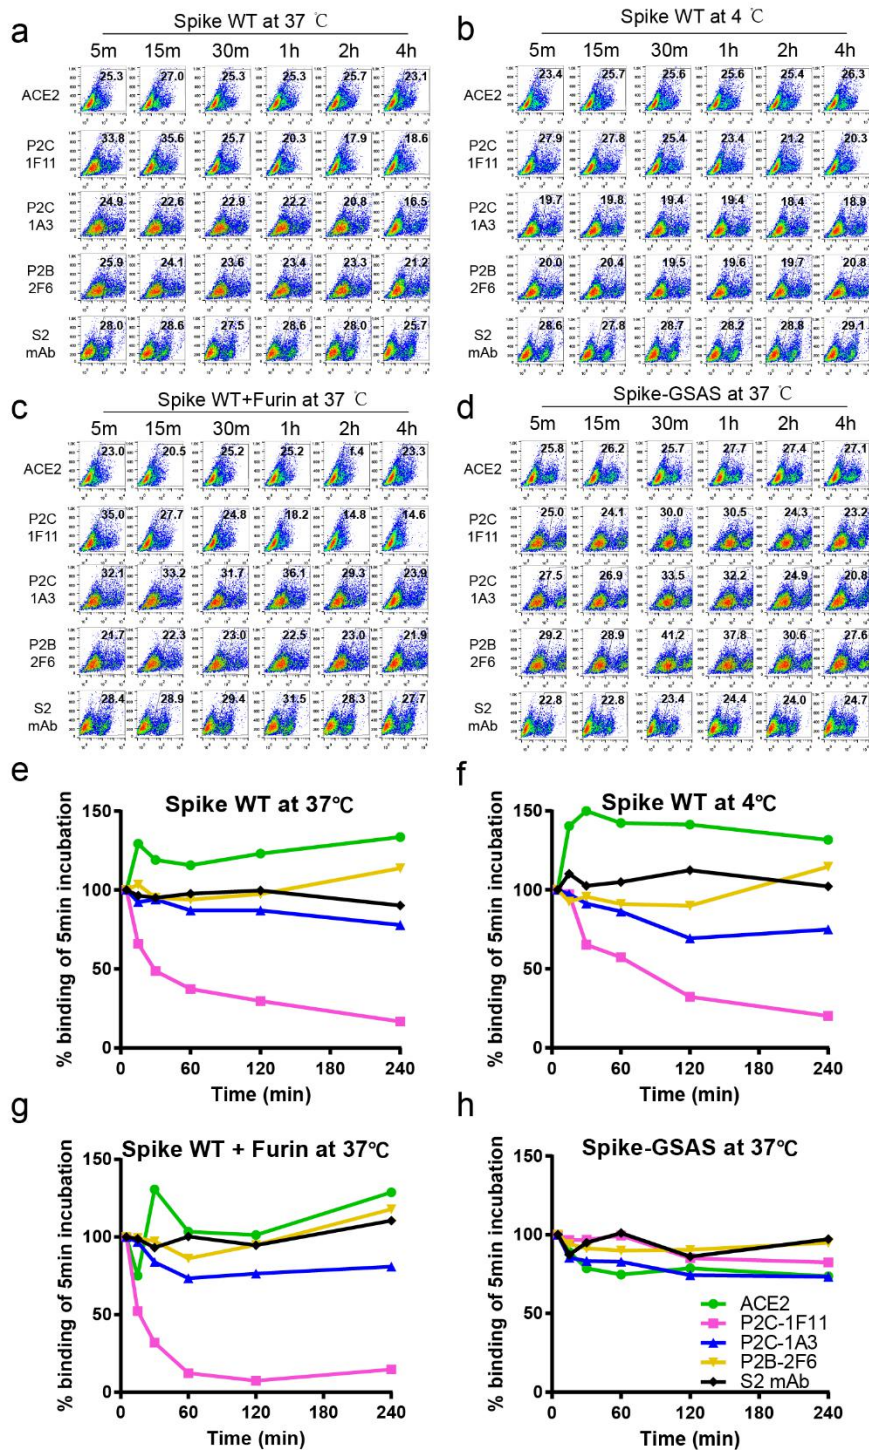

**Supplementary Fig. 6** Shedding of S1 over time measured by flow cytometry (**a**, **e**) at 37°C, (**b**, **f**) at 4°C, (**c**, **g**) at 37°C with co-transfection of the plasmid encoding Furin protease, or (**d**, **h**) at 37°C with a mutated S containing GSAS substitution at S1/S2 cleavage motif. For each panel of fluorescence, X-axis means ACE2 or tested antibody binding-PE or -FITC and Y-axis means SSC. Data shown were representative of at least two independent experiments.



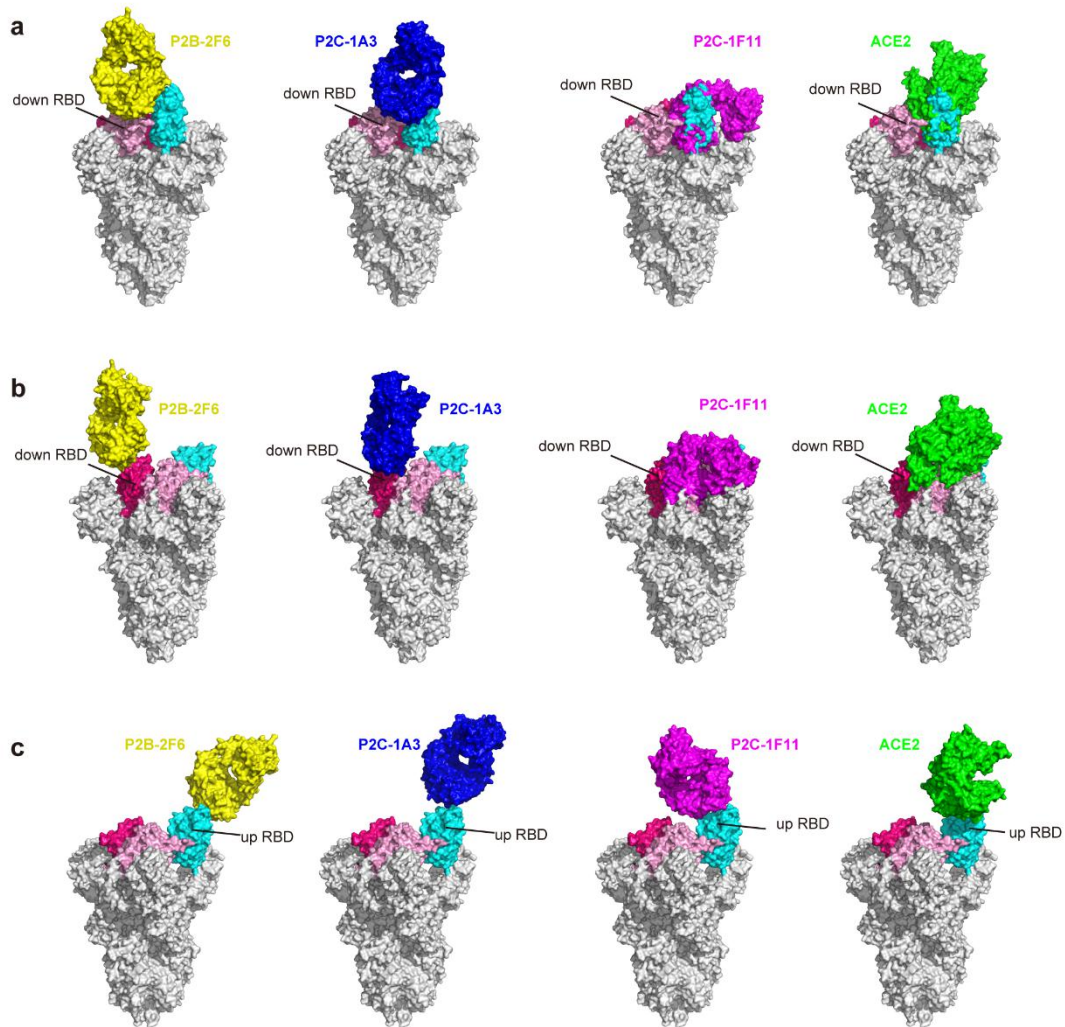

**Supplementary Fig. 7 Antibody and ACE2 binding models to different RBD conformations in the context of trimeric Spike.** The SARS-CoV-2 S trimer is shown in grey with one RBD in “up” (cyan) and two RBDs in “down” (pink and hot pink) conformations (PDB ID: 6VSB). **(a,b)** RBD-P2B-2F6 Fab and RBD-P2C-1A3 Fab can align with the “down” conformation whereas RBD-P2C-1F11 Fab and RBD-ACE2 cannot due to heavy spatial clash with the S trimer. **(c)** All RBD-P2B-2F6 Fab, RBD-P2C-1A3 Fab, RBD-P2C-1F11 Fab, and RBD-ACE2 align to the “up” RBD conformation. The P2B-2F6 Fab, P2C-1A3 Fab, P2C-1F11 Fab and ACE2 are colored in yellow, blue, magenta and green, respectively.

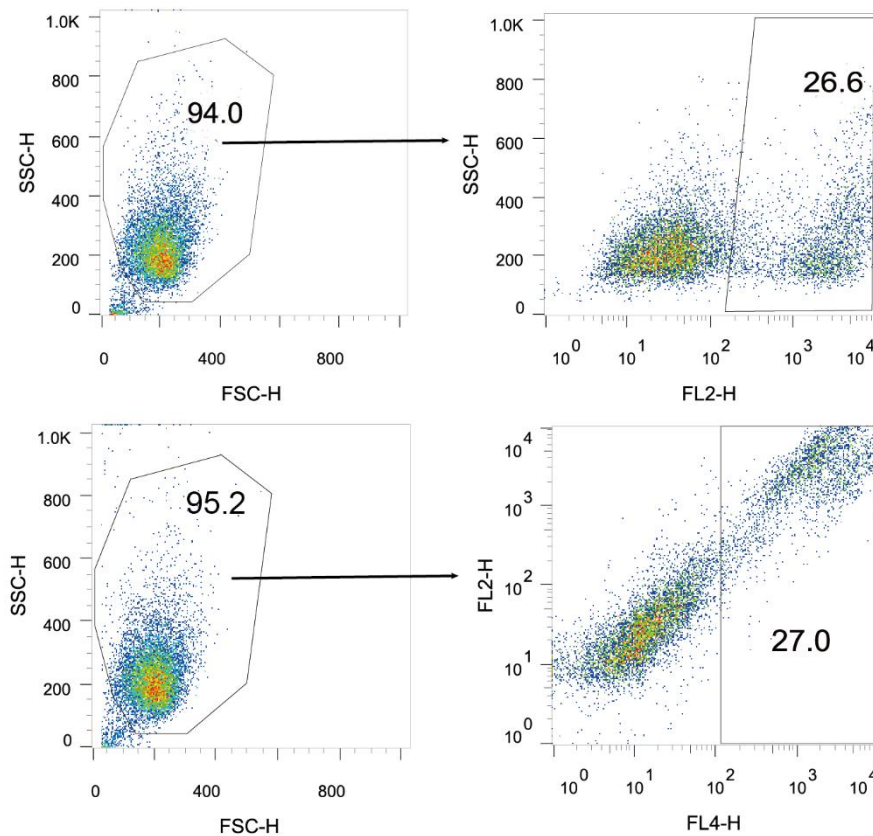

**Supplementary Fig. 8 Gating strategy used for cell-surface staining analysis.**

Upper gating strategy were used in the experiment to study the impact of single Alanine mutated S on the antibody binding activity (Figure 3a-d, Supplementary Fig. 2). HEK 293T cells transfected with plasmids encoding S or mutated S were incubated with ACE2 or antibodies, and stained with anti-his PE, anti-human IgG Fc PE or anti-mouse IgG FITC. Lower Gating strategy were used in the experiment to analyze the shedding process (Figure 4a-f, supplementary Fig. 5). HEK 293T cells transfected with plasmids encoding wild typed S or GSAS-S were incubated with tested antibodies, and stained with anti-human IgG Fc PE and anti-mouse IgG Fc APC simultaneously.

**Supplementary Table 1. Data collection and refinement statistics.**

| <b>Data collection</b>                   |                                        |                                       |
|------------------------------------------|----------------------------------------|---------------------------------------|
|                                          | <b>SARS-CoV-2 RBD-P2C-1F11 complex</b> | <b>SARS-CoV-2 RBD-P2C-1A3 complex</b> |
| Wavelength (Å)                           | 0.97918                                | 0.97918                               |
| Resolution range (Å)                     | 34.29-2.96 (3.04-2.96) *               | 50.00-3.40 (3.48-3.40) *              |
| Space group                              | C2                                     | P6 <sub>1</sub> 22                    |
| Unit cell dimensions                     |                                        |                                       |
| <i>a</i> , <i>b</i> , <i>c</i> (Å)       | 194.88, 85.39, 58.51                   | 89.411, 89.411, 437.923               |
| $\alpha$ , $\beta$ , $\gamma$ (°)        | 90, 100.29, 90                         | 90, 90, 120                           |
| Unique reflections                       | 19785 (1951)                           | 15108 (1332)                          |
| Completeness (%)                         | 99.68 (99.90)                          | 99.74 (89.69)                         |
| Mean I/sigma (I)                         | 10.1 (1.8)                             | 8.8 (1.2)                             |
| Redundancy                               | 6.8 (6.9)                              | 8.7 (7.9)                             |
| R <sub>merge</sub> (%)                   | 15.5 (99.7)                            | 11.8 (93.3)                           |
| R <sub>pim</sub> (%)                     | 9.7 (62.4)                             | 8.4 (45.7)                            |
| CC1/2                                    | 0.994 (0.752)                          | 0.990 (0.796)                         |
| Wilson B-factor (Å <sup>2</sup> )        | 61.70                                  | 105.13                                |
| <b>Structure refinement</b>              |                                        |                                       |
| Resolution (Å)                           | 29.03-2.96                             | 20.14-3.40                            |
| R <sub>work</sub> /R <sub>free</sub> (%) | 20.2/25.3                              | 23.5/28.3                             |
| No. atoms                                |                                        |                                       |
| Protein                                  | 4697                                   | 4763                                  |
| Ligands                                  | 14                                     | 14                                    |
| Protein residues                         | 616                                    | 621                                   |
| B-factors (Å <sup>2</sup> )              |                                        |                                       |
| Protein                                  | 60.95                                  | 125.59                                |
| Ligands                                  | 99.03                                  | 132.45                                |
| RMSD                                     |                                        |                                       |
| Bonds length (Å)                         | 0.008                                  | 0.009                                 |
| Bonds angles (°)                         | 1.02                                   | 1.09                                  |
| Ramachandran plot                        |                                        |                                       |
| Favored (%)                              | 95.21                                  | 91.99                                 |
| Allowed (%)                              | 4.63                                   | 8.01                                  |
| Outliers (%)                             | 0.17                                   | 0.00                                  |

\*One crystal was used for the data.

\*Values in the parentheses are for high-resolution shell.

**Supplementary Table 2. Contacts between SARS-CoV-2 RBD and P2C-1F11 or P2C-1A3 (distance cutoff 4Å).**

| P2C-1F11 |                    |      |                         | P2C-1A3 |                       |      |               | P2B-2F6 |                           |      |               |
|----------|--------------------|------|-------------------------|---------|-----------------------|------|---------------|---------|---------------------------|------|---------------|
| RBD      | Heavy chain        | RBD  | Light chain             | RBD     | Heavy chain           | RBD  | Light chain   | RBD     | Heavy chain               | RBD  | Light chain   |
| T415     | S56, Y58           | R403 | Y33                     | V445    | D73                   | T478 | S28, Y30, N90 | R346    | H54                       | V483 | G31, Y32, N33 |
| G416     | Y52, Y58           | Y453 | Y33                     | G446    | R72, D73              | N481 | Q25, S91      | K444    | S31                       | E484 | N33, Y34      |
| K417     | Y52                | G502 | S28                     | Y449    | S54, R72, D73, N74    | V483 | S91           | G446    | Y27                       | G485 | N33           |
| D420     | Y52, S56           | Y505 | S28, V29, S30, Q91, Y92 | F456    | H102                  | E484 | S91, Y92      | G447    | Y27, S31                  |      |               |
| Y421     | Y33, Y52, S53, G54 |      |                         | E484    | Y33, Y50, T57         | G485 | N90           | N448    | S31                       |      |               |
| L455     | Y33, V101          |      |                         | G485    | F100                  | F486 | Y30, L89      | Y449    | S31, G102, I103, Y27, Y33 |      |               |
| F456     | Y33, L99           |      |                         | F486    | F100, S101, L105      | N487 | Y30           | N450    | H54, S30, S31             |      |               |
| R457     | S53                |      |                         | Y489    | Y33, F100, S101, H102 |      |               | L452    | V105, I103                |      |               |
| K458     | S31, S53, G54      |      |                         | F490    | T57                   |      |               | E484    | R112                      |      |               |
| N460     | G54                |      |                         | L492    | S56                   |      |               | F490    | P107, V105                |      |               |
| Y473     | S31, S53           |      |                         | Q493    | S53, S54, H102        |      |               | S494    | I103                      |      |               |
| Q474     | S31                |      |                         | S494    | S54, S56              |      |               |         |                           |      |               |
| A475     | I27, T28, N32, R97 |      |                         | Q498    | D73, N74, A75         |      |               |         |                           |      |               |
| G476     | T28                |      |                         | T500    | A75                   |      |               |         |                           |      |               |
| S477     | T28                |      |                         |         |                       |      |               |         |                           |      |               |
| F486     | R97, D105          |      |                         |         |                       |      |               |         |                           |      |               |
| N487     | G26, I27, R97      |      |                         |         |                       |      |               |         |                           |      |               |
| Y489     | R97, L99           |      |                         |         |                       |      |               |         |                           |      |               |
| Q493     | Y102               |      |                         |         |                       |      |               |         |                           |      |               |

**Supplementary Table 3. Primers used in this manuscript.**

| Name                 | Sequence (5'-3')                                               |
|----------------------|----------------------------------------------------------------|
| RBD-319F-BamHI-B12   | CTGCCTTTGCGGCGGATCCCAGAGTGCAGCCTACCGAG                         |
| RBD-529R-HindIII-B12 | AGTACTTCTCGACAAGCTTCTAATGGTGATGGTGATGGTGCTTCTTAGGGC<br>CGCACAC |
| spike-F              | GGTACCGAGCTCGGATCCGGATCCACCACCATGTTCTGTTCTCTGGTG               |
| spike-R              | CTGTGCTGGATATCTGCAGAATTCTCATTAGGTGTAGTGCAGCTTCACG              |
| T415A-F              | GGCAGGCGGGCAAGATCGCCGACTAC                                     |
| T415A-R              | TTGCCCCGCTGCCCTGGCGCGATCTG                                     |
| D420A-F              | TCGCCGCGTACAATTACAAGCTGCCT                                     |
| D420A-R              | TTGTACGCGGCGATCTTGCCGGTCTG                                     |
| Y421A-F              | CCGACGCGAATTACAAGCTGCCTGAC                                     |
| Y421A-R              | TAATTCGCGTCCGGCGATCTTGCCGGT                                    |
| Y453A-F              | ACCTGGCGAGACTGTTCCAGAAAGAGC                                    |
| Y453A-R              | AGTCTCGCCAGGTAATTGTAATTGCC                                     |
| L455A-F              | ACAGAGCGTTCAGAAAGAGCAATCTG                                     |
| L455A-R              | CTGAACGCTCTGTACAGGTAATTGTA                                     |
| F456A-F              | GACTGGCGAGAAAGAGCAATCTGAAG                                     |
| F456A-R              | TTTCTCGCCAGTCTGTACAGGTAATT                                     |
| R457A-F              | TGTTCCGGAAGAGCAATCTGAAGCCT                                     |
| R457A-R              | CTCTTCGCGAACAGTCTGTACAGGTA                                     |
| K458A-F              | TCAGAGCGAGCAATCTGAAGCCTTTC                                     |
| K458A-R              | TTGCTCGCTCTGAACAGTCTGTACAG                                     |
| N460A-F              | AGAGCGCGCTGAAGCCTTTCGAGAGA                                     |
| N460A-R              | TTCAGCGCGCTCTTCTGAACAGTCT                                      |
| Y473A-F              | AGATCGCGCAGGCCGGCAGCACACCG                                     |
| Y473A-R              | GCCTGCGCGATCTCGGTGCTGATGTC                                     |
| S477A-F              | CCGGCGCGACACCGTGTAAATGGCGTG                                    |
| S477A-R              | GGTGTGCGCGCCGGCCTGGTAGATCTC                                    |
| F486A-F              | AGGGCGCGAATTGCTACTTCCCTCTG                                     |
| F486A-R              | CAATTCGCGCCCTCCACGCCATTACA                                     |
| N487A-F              | GCTTCGCGTGCTACTTCCCTCTGCAG                                     |
| N487A-R              | TAGCACGCGAAGCCCTCCACGCCATT                                     |
| Y489A-F              | ATTGCGCGTTCCCTCTGCAGAGCTAC                                     |
| Y489A-R              | GGGAACGCGCAATTGAAGCCCTCCAC                                     |
| Q493A-F              | CTCTGGCGAGCTACGGCTTCCAGCCT                                     |
| Q493A-R              | TAGCTCGCCAGAGGGAAGTAGCAATT                                     |
| Y505A-F              | TGGGCGCGCAGCCTTACAGAGTGGTG                                     |
| Y505A-R              | GGCTGCGCGCCCACGCCATTGGTAGG                                     |
